# Supplementary material
Source: Springer Nature journal article supplement (https://www.springermedizin.de/resource/supplementary/12960_2003_8_MOESM1_ESM.pdf/9569742)
Supplement: MOESM1 [file 9569742]

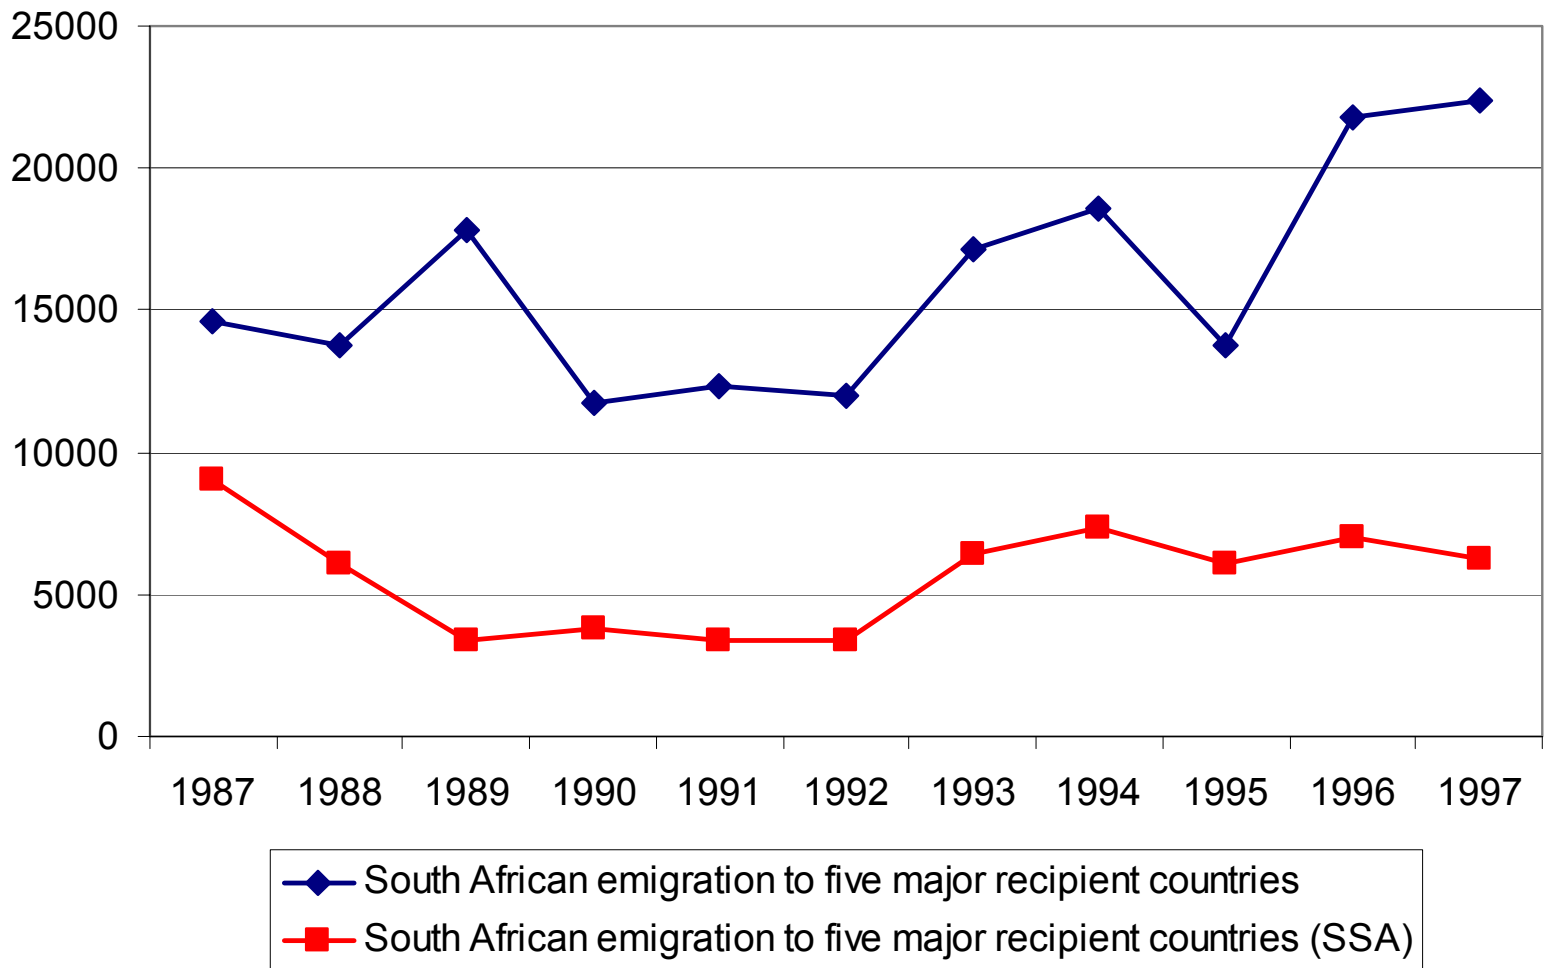

Source: Statistics South Africa: Tourism and Migration, Pretoria  
<http://www.statssa.gov.za/default1.asp> Last accessed 22/8/03
